# Supplementary material for: Activated natural porous silicate for a highly promising SiOxnanostructure finely impregnated with carbon nanofibers as a high performance anode material for lithium-ion batteries
Source: Royal Society of Chemistry journal article supplement (doi:10.1039/c4ta02706j), 2014-06-18
Supplement: c4ta02706j1.pdf [file c4ta02706j1.pdf]

## Supporting Information

### **Activated natural porous silicate for a highly promising SiO<sub>x</sub> nanostructure finely impregnated with carbon nanofiber as a high performance anode material for lithium-ion batteries**

Chang-Keun Back,<sup>\*a</sup> Tai-Jin Kim,<sup>b</sup> and Nam-Soon Choi<sup>\*c</sup>

<sup>a</sup> *Central R&D Center, Hanwha Chemical Co.Ltd., Daejeoun City, 305-350, South Korea.*

*E-mail: changkeun.back@hanwha.co.kr*

<sup>b</sup> *Department of Chemical Engineering, The University of Suwon,*

*Kyung-gi, 445-743, South Korea.*

<sup>c</sup> *School of Energy and Chemical Engineering, Ulsan National Institute of Science and  
Technology (UNIST), Ulsan, 689-798, South Korea. E-mail: nschoi@unist.ac.kr*

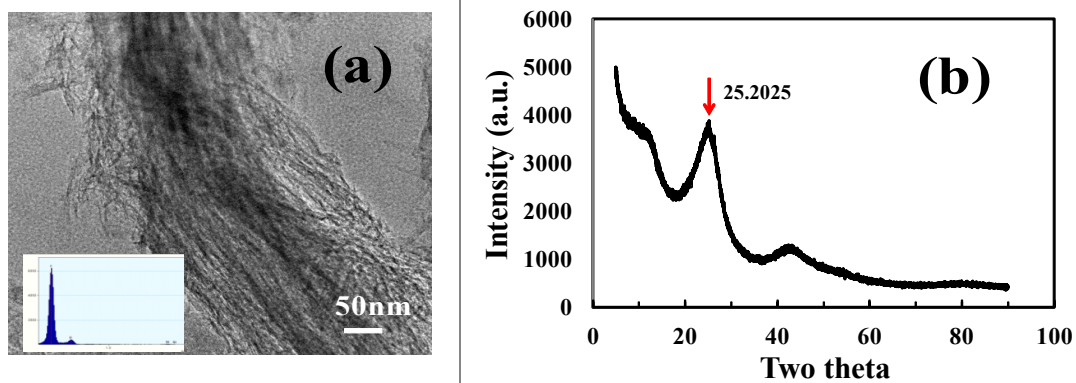

**Fig. S1.** (a) TEM image of the CNFs that were collected from the CNF-sepiolite nanocomposite by removing the sepiolite only. The CNF-sepiolite nanocomposite was first acid treated using hydrochloric acid to remove Mg element, and then dissolved in hydro-fluoric (HF) solution to remove silica material. This procedure induces in the remaining of the pure CNFs only. The fibrous morphology of the CNFs having the size of several nm in the thickness and several  $\mu\text{m}$  in the length reflects the fiber structure of the sepiolite having the nano open-channels along its axis. The inset of Fig. S1(a) shows the EDS spectrum for the chemical composition of the CNFs having pure carbon element. (b) XRD pattern of the CNFs. The inter layer distance between graphene layers of the CNFs,  $d_{002}$ , is 3.53 nm by the calculation using Bragg's equation.

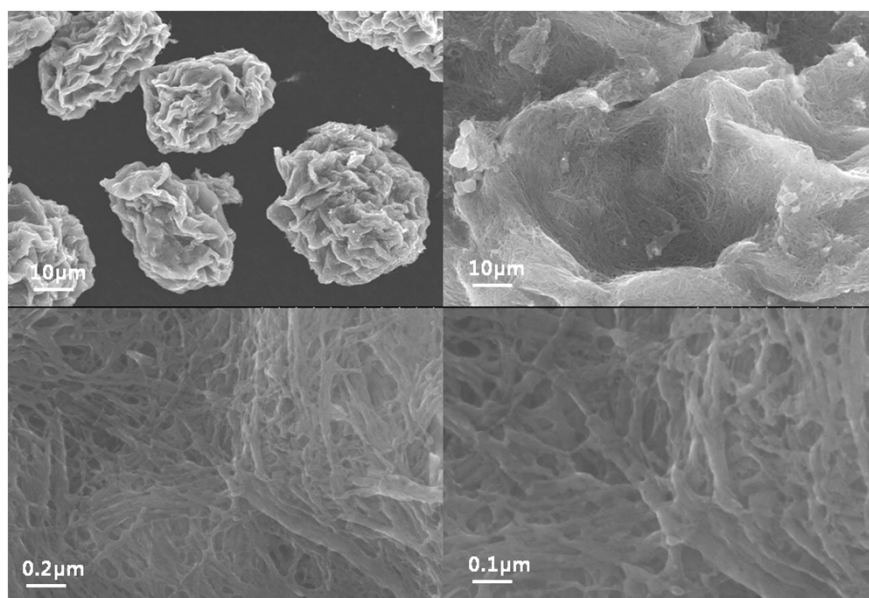

**Fig. S2.** SEM images of the morphology of CNF-SiO<sub>x</sub> nanostructures. The secondary bulk particle is in a size range between 30~40  $\mu\text{m}$  and has the shape of a roundly bunched piece of CNF-SiO<sub>x</sub> nanostructure. The primary particles of 30~40 nm in diameter are inter-connected with each other to form porous network bulk structure.

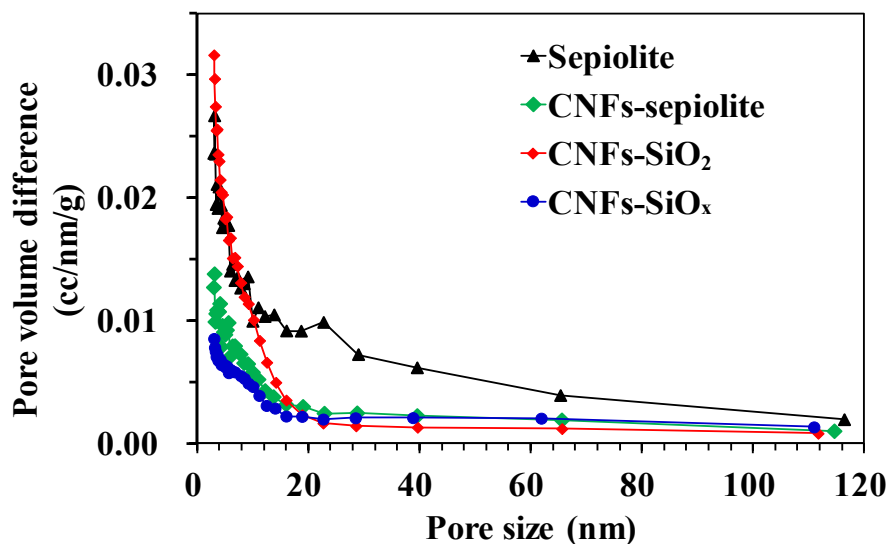

**Fig. S3.** Pore size distribution by the BJH measurement of the sepiolite derived nanostructures using nitrogen adsorption at 77K.
